# Supplementary material
Source: PubMed Central journal article supplement (PMC2442534)
Supplement: pp.108.121996_1.pdf [file pp.108.121996_1.pdf]

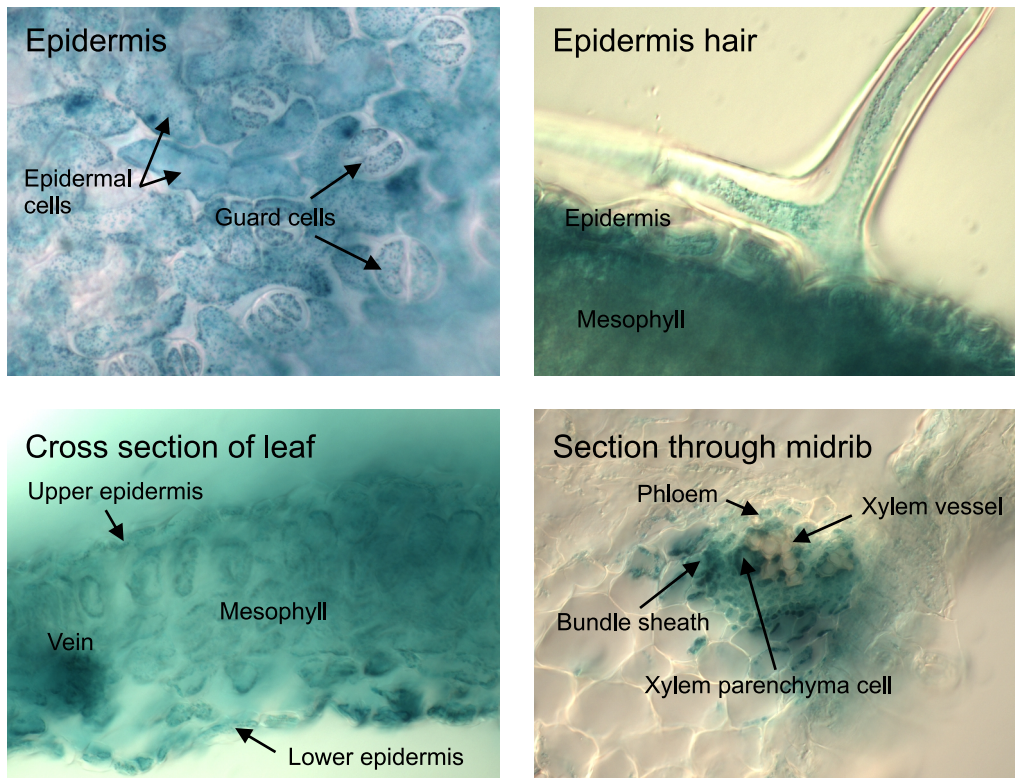

**Supplemental Figure S1. Pattern of GUS Expression in *essp3* Leaves.** The GUS reporter is under a soybean  $\beta$ -conglycinin promoter. Whole mounts and cross sections observed for stained leaves. All images taken on a Carl Zeiss microscope using a Q-Imaging digital camera system (Quorum Technologies Inc., Guelph, ON, Canada).
