# Supplementary material
Source: PubMed Central journal article supplement (PMC2442534)
Supplement: pp.108.121996_2.pdf [file pp.108.121996_2.pdf]

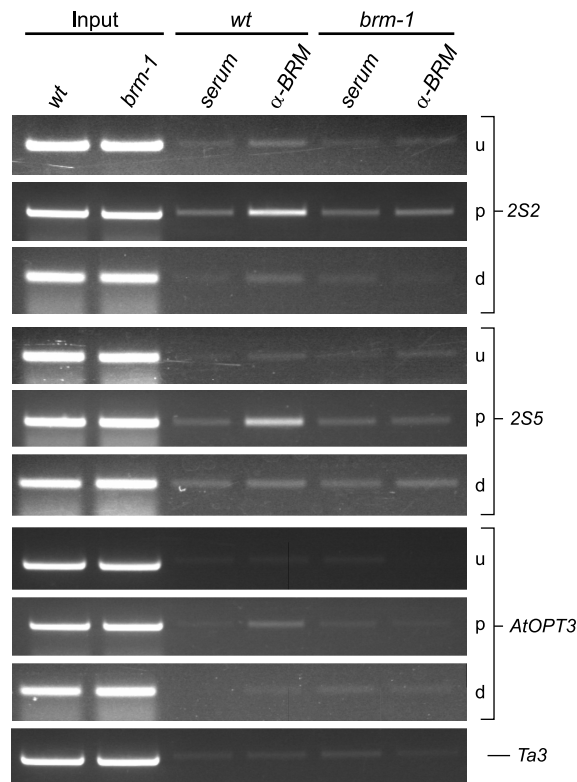

**Supplemental Figure S2. Recruitment of BRM to Promoters of Selected Embryogenesis Genes.** Chromatin immunoprecipitations (ChIP) analysis with antibodies against BRM ( $\alpha$ -BRM-N). Leaves from 14-day-old wild type and *brm-1* mutant plants grown on MS agar containing 1.5% sucrose were analysed with  $\alpha$ -BRM-N. Input and pre-immune serum (serum, Upstate) are shown as positive and negative controls, respectively. Promoter regions (p, within 700-bp upstream of start codon) as well as regions further upstream (u) and downstream (d) of the three embryogenesis genes were analyzed by PCR. Primer sequences are listed in Supplemental Table 3 online. *Ta3* was also amplified as a control for repressed loci (Johnson et al., 2002).
